# Supplementary material for: To beat or not to beat a tick: comparison of DNA extraction methods for ticks (Ixodes scapularis)
Source: PeerJ. 2015 Aug 13;3:e1147. doi: 10.7717/peerj.1147 (PMC4540005; doi:10.7717/peerj.1147)
Supplement: Table S2 [file peerj-03-1147-s002.xlsx]

## Sheet: PCRs
Table S2. PCR amplification success for each DNA extraction method and physical disruption type.
DNA extraction method	Duration (min)	MP Bio Matrix	tick Cox1		tick Microsatellite		Rickettsia ompA
			nymph	female	nymph	female	nymph	female		Rickettsia	TOTAL ticks	Nymphs	Females		Total per method (max=234 or 36)	Nymphs (max=117 or 18)	Females (max=117 or 18)
QIAGEN	1.5	G	0	0	3	3	0	3		3	9	3	6		143	58	85
		H	0	0	2	3	0	2		2	7	2	5		0.611111	0.495726	0.726496
		I	0	0	1	2	0	2		2	5	1	4
		M	0	0	1	3	0	3		3	7	1	6
		S	0	0	1	2	0	3		3	6	1	5
		Z	0	0	0	2	0	3		3	5	0	5
	4	G	3	3	3	3	3	3		6	18	9	9
		H	3	3	3	3	3	2		5	17	9	8
		I	3	1	3	3	1	3		4	14	7	7
		M	0	0	1	3	0	3		3	7	1	6
		S	3	2	3	3	3	3		6	17	9	8
		Z	3	2	3	2	1	3		4	14	7	7
	cut		3	3	3	3	2	3		5	17	8	9
Thermo	1.5	G	3	3	3	3	3	2		5	17	9	8		201	99	102
		H	3	2	3	3	3	3		6	17	9	8		0.858974	0.846154	0.871795
		I	3	3	3	3	3	3		6	18	9	9
		M	0	0	2	3	0	3		3	8	2	6
		S	3	3	3	3	3	3		6	18	9	9
		Z	3	2	3	3	1	3		4	15	7	8
	4	G	3	3	3	3	3	3		6	18	9	9
		H	3	2	3	3	3	3		6	17	9	8
		I	3	3	3	3	2	3		5	17	8	9
		M	0	0	3	2	0	1		1	6	3	3
		S	3	2	3	2	3	3		6	16	9	7
		Z	3	3	3	3	3	3		6	18	9	9
	cut		3	3	2	3	2	3		5	16	7	9
NH4OH	1.5	G	0	0	1	3	0	0		0	4	1	3		137	37	100
		H	0	3	2	3	0	2		2	10	2	8		0.58547	0.316239	0.854701
		I	0	3	0	3	0	3		3	9	0	9
		M	3	0	3	3	3	3		6	15	9	6
		S	0	3	3	3	0	3		3	12	3	9
		Z	0	3	2	3	0	3		3	11	2	9
	4	G	0	3	3	2	0	1		1	9	3	6
		H	0	3	3	3	0	3		3	12	3	9
		I	0	3	0	3	0	3		3	9	0	9
		M	3	0	3	3	3	2		5	14	9	5
		S	0	3	3	3	0	3		3	12	3	9
		Z	0	3	2	3	0	3		3	11	2	9
	cut		0	3	0	3	0	3		3	9	0	9
MoBio	whole		0	3	0	2	0	2		2	7	0	7		18	2	16
	cut		1	3	1	3	0	3		3	11	2	9		0.5	0.111111	0.888889
Zymo	whole		0	0	0	0	0	0		0	0	0	0		3	0	3
	cut		0	0	0	0	0	3		3	3	0	3		0.0833333	0	0.166667
Yellow: 100% PCR success
Pink: 8 out of 9 positive PCR reactions for nymphs or females
